# Supplementary material for: Leishmania infantum β-Tubulin Identified by Reverse Engineering Technology through Phage Display Applied as Theranostic Marker for Human Visceral Leishmaniasis
Source: PubMed Central journal article supplement (PMC6514782; doi:10.3390/ijms20081812), 2019-04-12
Supplement: ijms-20-01812-s001.pdf [file ijms-20-01812-s001.pdf]

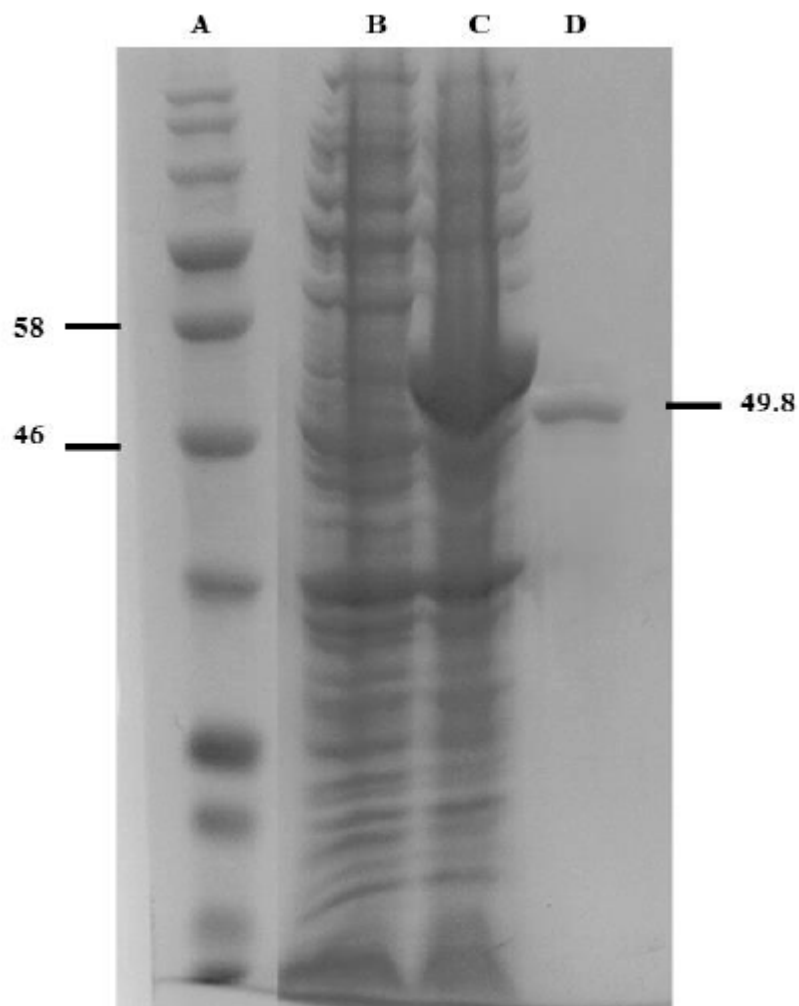

**Figure S1.** Purification of the recombinant  $\beta$ -tubulin protein. The evaluation of the purification process was obtained after performing a 10% SDS-PAGE gel. In (A), a molecular weight marker with some bands is shown. In (B) and (C), 10  $\mu$ g of total bacterial cultures non-expressing and expressing the recombinant protein (presenting about 49.8 kDa), respectively, and in (D), the recombinant protein (10  $\mu$ g) purified by affinity chromatography are also shown.
